# Supplementary material for: Single-cell RNA-seq uncovered hemocyte functional subtypes and their differentiational characteristics and connectivity with morphological subpopulations in Litopenaeus vannamei
Source: Front Immunol. 2022 Sep 13;13:980021. doi: 10.3389/fimmu.2022.980021 (PMC9513592; doi:10.3389/fimmu.2022.980021)
Supplement: Supplementary File 2 — GO functional annotation and KEGG pathway enrichment analysis of the differential genes among the hemocyte clusters. [file Table_2.xlsx]

## Sheet: Sheet1
Cluster 0/TGase+ cluster						Cluster 1/CTL-2+ cluster						Cluster 2/Crustin+cluster						Cluster 3/Non-hm
GO Enrichment (Biological Process)						GO Enrichment (Biological Process)						GO Enrichment (Biological Process)						GO Enrichment (Biological Process)
GO ID	Description	Cluster_0 (118)	All (2202)	pvalue	p.adjust	GO ID	Description	Cluster_0 (118)	All (2202)	pvalue	p.adjust	GO ID	Description	Cluster_0 (118)	All (2202)	pvalue	p.adjust	GO ID	Description	Cluster_0 (118)	All (2202)	pvalue	p.adjust
GO:0010467	gene expression	58 (49.15%)	366 (16.62%)	0	0	GO:0006818	hydrogen transport	7 (4.79%)	18 (0.82%)	8.4e-05	0.016328	GO:0050790	regulation of catalytic activity	2 (14.29%)	29 (1.32%)	0.01382	0.26275	GO:0007010	cytoskeleton organization	10 (10.75%)	49 (2.23%)	2.3e-05	0.003891
GO:0043170	macromolecule metabolic process	75 (63.56%)	828 (37.6%)	0	1e-06	GO:0015992	proton transport	6 (4.11%)	14 (0.64%)	0.000148	0.016328	GO:0010466	negative regulation of peptidase activity	1 (7.14%)	3 (0.14%)	0.018961	0.26275	GO:0008064	regulation of actin polymerization or depolymerization	5 (5.38%)	11 (0.5%)	4.6e-05	0.003891
GO:0071704	organic substance metabolic process	84 (71.19%)	1055 (47.91%)	0	2.7e-05	GO:0006508	proteolysis	12 (8.22%)	56 (2.54%)	0.000202	0.016328	GO:0051346	negative regulation of hydrolase activity	1 (7.14%)	3 (0.14%)	0.018961	0.26275	GO:0030041	actin filament polymerization	5 (5.38%)	11 (0.5%)	4.6e-05	0.003891
GO:0008152	metabolic process	96 (81.36%)	1343 (60.99%)	1e-06	0.000146	GO:0006754	ATP biosynthetic process	3 (2.05%)	3 (0.14%)	0.000286	0.016328	GO:0052547	regulation of peptidase activity	1 (7.14%)	3 (0.14%)	0.018961	0.26275	GO:0030832	regulation of actin filament length	5 (5.38%)	11 (0.5%)	4.6e-05	0.003891
GO:0022613	ribonucleoprotein complex biogenesis	7 (5.93%)	22 (1%)	9.3e-05	0.012242	GO:0009144	purine nucleoside triphosphate metabolic process	3 (2.05%)	3 (0.14%)	0.000286	0.016328	GO:0071173	spindle assembly checkpoint	1 (7.14%)	3 (0.14%)	0.018961	0.26275	GO:0030833	regulation of actin filament polymerization	5 (5.38%)	11 (0.5%)	4.6e-05	0.003891
GO:0042254	ribosome biogenesis	4 (3.39%)	8 (0.36%)	0.000464	0.038555	GO:0009145	purine nucleoside triphosphate biosynthetic process	3 (2.05%)	3 (0.14%)	0.000286	0.016328	GO:0031577	spindle checkpoint	1 (7.14%)	4 (0.18%)	0.025207	0.26275	GO:0032271	regulation of protein polymerization	5 (5.38%)	11 (0.5%)	4.6e-05	0.003891
GO:0006412	translation	10 (8.47%)	55 (2.5%)	0.000502	0.038555	GO:0009205	purine ribonucleoside triphosphate metabolic process	3 (2.05%)	3 (0.14%)	0.000286	0.016328	GO:0065009	regulation of molecular function	2 (14.29%)	43 (1.95%)	0.029216	0.26275	GO:0051258	protein polymerization	5 (5.38%)	11 (0.5%)	4.6e-05	0.003891
GO:0048024	regulation of mRNA splicing, via spliceosome	3 (2.54%)	4 (0.18%)	0.000577	0.038555	GO:0009206	purine ribonucleoside triphosphate biosynthetic process	3 (2.05%)	3 (0.14%)	0.000286	0.016328	GO:0008643	carbohydrate transport	1 (7.14%)	5 (0.23%)	0.031416	0.26275	GO:0008154	actin polymerization or depolymerization	5 (5.38%)	12 (0.54%)	7.6e-05	0.004514
GO:0050684	regulation of mRNA processing	3 (2.54%)	4 (0.18%)	0.000577	0.038555	GO:0046034	ATP metabolic process	3 (2.05%)	3 (0.14%)	0.000286	0.016328	GO:0015766	disaccharide transport	1 (7.14%)	5 (0.23%)	0.031416	0.26275	GO:0032956	regulation of actin cytoskeleton organization	5 (5.38%)	12 (0.54%)	7.6e-05	0.004514
GO:0043043	peptide biosynthetic process	10 (8.47%)	56 (2.54%)	0.000583	0.038555	GO:0009142	nucleoside triphosphate biosynthetic process	4 (2.74%)	7 (0.32%)	0.000555	0.023778	GO:0015772	oligosaccharide transport	1 (7.14%)	5 (0.23%)	0.031416	0.26275	GO:0043254	regulation of protein complex assembly	5 (5.38%)	12 (0.54%)	7.6e-05	0.004514
GO:0016071	mRNA metabolic process	6 (5.08%)	22 (1%)	0.000767	0.042971	GO:0009199	ribonucleoside triphosphate metabolic process	4 (2.74%)	7 (0.32%)	0.000555	0.023778	GO:0043086	negative regulation of catalytic activity	1 (7.14%)	5 (0.23%)	0.031416	0.26275	GO:0032535	regulation of cellular component size	5 (5.38%)	13 (0.59%)	0.000119	0.005454
GO:0006518	peptide metabolic process	10 (8.47%)	58 (2.63%)	0.00078	0.042971	GO:0009201	ribonucleoside triphosphate biosynthetic process	4 (2.74%)	7 (0.32%)	0.000555	0.023778	GO:0045861	negative regulation of proteolysis	1 (7.14%)	6 (0.27%)	0.037588	0.288174	GO:0032970	regulation of actin filament-based process	5 (5.38%)	13 (0.59%)	0.000119	0.005454
GO:0043604	amide biosynthetic process	10 (8.47%)	59 (2.68%)	0.000897	0.045627	GO:0015672	monovalent inorganic cation transport	6 (4.11%)	19 (0.86%)	0.001011	0.038668	GO:0006778	porphyrin-containing compound metabolic process	1 (7.14%)	8 (0.36%)	0.049823	0.302441	GO:0051493	regulation of cytoskeleton organization	5 (5.38%)	13 (0.59%)	0.000119	0.005454
GO Enrichment (Molecular Function)						GO:0009141	nucleoside triphosphate metabolic process	4 (2.74%)	8 (0.36%)	0.001053	0.038668	GO:0030162	regulation of proteolysis	1 (7.14%)	8 (0.36%)	0.049823	0.302441	GO:0007015	actin filament organization	5 (5.38%)	14 (0.64%)	0.000179	0.007617
GO ID	Description	Cluster_0 (103)	All (2153)	pvalue	p.adjust	GO Enrichment (Molecular Function)						GO:0044092	negative regulation of molecular function	1 (7.14%)	8 (0.36%)	0.049823	0.302441	GO:0044087	regulation of cellular component biogenesis	5 (5.38%)	15 (0.68%)	0.000259	0.01008
GO:0005198	structural molecule activity	18 (17.48%)	67 (3.11%)	0	0	GO ID	Description	Cluster_0 (103)	All (2153)	pvalue	p.adjust	GO Enrichment (Molecular Function)						GO:0034622	cellular macromolecular complex assembly	8 (8.6%)	42 (1.91%)	0.00027	0.01008
GO:0003723	RNA binding	17 (16.5%)	70 (3.25%)	0	1e-06	GO:0005198	structural molecule activity	18 (17.48%)	67 (3.11%)	0	0	GO ID	Description	Cluster_0 (103)	All (2153)	pvalue	p.adjust	GO:0050794	regulation of cellular process	39 (41.94%)	561 (25.48%)	0.000291	0.01021
GO:0097159	organic cyclic compound binding	55 (53.4%)	658 (30.56%)	1e-06	2.7e-05	GO:0003723	RNA binding	17 (16.5%)	70 (3.25%)	0	1e-06	GO:0016835	carbon-oxygen lyase activity	2 (10%)	6 (0.28%)	0.001203	0.025264	GO:0035556	intracellular signal transduction	12 (12.9%)	94 (4.27%)	0.000429	0.014217
GO:1901363	heterocyclic compound binding	50 (48.54%)	631 (29.31%)	1.9e-05	0.000614	GO:0097159	organic cyclic compound binding	55 (53.4%)	658 (30.56%)	1e-06	2.7e-05	GO:0016836	hydro-lyase activity	2 (10%)	6 (0.28%)	0.001203	0.025264	GO:0090066	regulation of anatomical structure size	5 (5.38%)	18 (0.82%)	0.000668	0.020989
GO:0003676	nucleic acid binding	30 (29.13%)	297 (13.79%)	2.4e-05	0.000622	GO:1901363	heterocyclic compound binding	50 (48.54%)	631 (29.31%)	1.9e-05	0.000614	GO:0016667	oxidoreductase activity, acting on a sulfur group of donors	2 (10%)	9 (0.42%)	0.002839	0.03975	GO:0050789	regulation of biological process	42 (45.16%)	659 (29.93%)	0.001081	0.030878
GO:0019207	kinase regulator activity	3 (2.91%)	6 (0.28%)	0.001915	0.040847	GO:0003676	nucleic acid binding	30 (29.13%)	297 (13.79%)	2.4e-05	0.000622	GO Enrichment (Cellular Component)						GO Enrichment (Molecular Function)
GO Enrichment (Cellular Component)						GO:0019207	kinase regulator activity	3 (2.91%)	6 (0.28%)	0.001915	0.040847	GO ID	Description	Cluster_0 (99)	All (1482)	pvalue	p.adjust	GO ID	Description	Cluster_0 (103)	All (2153)	pvalue	p.adjust
GO ID	Description	Cluster_0 (99)	All (1482)	pvalue	p.adjust	GO Enrichment (Cellular Component)						——	——	——	——	——	——	GO:0001883	purine nucleoside binding	20 (25.32%)	256 (11.89%)	0.000592	0.020122
GO:0030529	intracellular ribonucleoprotein complex	51 (51.52%)	114 (7.69%)	0	0	GO ID	Description	Cluster_0 (99)	All (1482)	pvalue	p.adjust	Pathway Enrichment						GO:0032549	ribonucleoside binding	20 (25.32%)	256 (11.89%)	0.000592	0.020122
GO:1990904	ribonucleoprotein complex	51 (51.52%)	114 (7.69%)	0	0	GO:0043234	protein complex	31 (33.33%)	180 (12.15%)	0	3e-06	Pathway	Candidate genes with pathway annotation (264)	All genes with pathway annotation (5605)	Pvalue	Qvalue	Pathway ID	GO:0032550	purine ribonucleoside binding	20 (25.32%)	256 (11.89%)	0.000592	0.020122
GO:0005840	ribosome	20 (20.2%)	42 (2.83%)	0	0	GO:0098796	membrane protein complex	13 (13.98%)	40 (2.7%)	0	1.8e-05	Antigen processing and presentation	4 (10.81%)	26 (0.46%)	2.2e-05	0.001029	ko04612	GO:0001882	nucleoside binding	20 (25.32%)	257 (11.94%)	0.000624	0.020122
GO:0032991	macromolecular complex	57 (57.58%)	367 (24.76%)	0	0	GO:0030117	membrane coat	7 (7.53%)	14 (0.94%)	7e-06	0.000222	Pentose phosphate pathway	4 (10.81%)	28 (0.5%)	2.9e-05	0.001029	ko00030	GO:0097367	carbohydrate derivative binding	20 (25.32%)	265 (12.31%)	0.000934	0.023555
GO:0044391	ribosomal subunit	16 (16.16%)	31 (2.09%)	0	0	GO:0048475	coated membrane	7 (7.53%)	14 (0.94%)	7e-06	0.000222	Protein processing in endoplasmic reticulum	8 (21.62%)	214 (3.82%)	5.9e-05	0.00137	ko04141	GO:0036094	small molecule binding	23 (29.11%)	330 (15.33%)	0.001096	0.023555
GO:0005622	intracellular	91 (91.92%)	1032 (69.64%)	0	1e-06	GO:0032991	macromolecular complex	41 (44.09%)	367 (24.76%)	2e-05	0.000484	Glutathione metabolism	5 (13.51%)	103 (1.84%)	0.000519	0.009088	ko00480	GO:0004672	protein kinase activity	10 (12.66%)	91 (4.23%)	0.001426	0.026283
GO:0044424	intracellular part	88 (88.89%)	1011 (68.22%)	1e-06	1e-05	GO:0044425	membrane part	27 (29.03%)	205 (13.83%)	5.8e-05	0.001178	Nitrogen metabolism	2 (5.41%)	13 (0.23%)	0.00316	0.044234	ko00910	GO:0044877	macromolecular complex binding	5 (6.33%)	25 (1.16%)	0.001747	0.028177
GO:0005912	adherens junction	6 (6.06%)	9 (0.61%)	5e-06	5e-05	GO:0033178	proton-transporting two-sector ATPase complex, catalytic domain	3 (3.23%)	3 (0.2%)	0.00024	0.004143	Thyroid hormone synthesis	3 (8.11%)	50 (0.89%)	0.004193	0.048007	ko04918	GO:0043021	ribonucleoprotein complex binding	3 (3.8%)	8 (0.37%)	0.002332	0.033423
GO:0005924	cell-substrate adherens junction	6 (6.06%)	9 (0.61%)	5e-06	5e-05	GO:0016469	proton-transporting two-sector ATPase complex	5 (5.38%)	11 (0.74%)	0.000299	0.004525	Steroid biosynthesis	2 (5.41%)	16 (0.29%)	0.004801	0.048007	ko00100	GO:0016773	phosphotransferase activity, alcohol group as acceptor	10 (12.66%)	101 (4.69%)	0.003159	0.040753
GO:0030055	cell-substrate junction	6 (6.06%)	9 (0.61%)	5e-06	5e-05	GO:0030120	vesicle coat	3 (3.23%)	5 (0.34%)	0.002183	0.024173							GO:0003779	actin binding	2 (2.53%)	3 (0.14%)	0.003895	0.045673
GO:0070161	anchoring junction	6 (6.06%)	9 (0.61%)	5e-06	5e-05	GO:0030662	coated vesicle membrane	3 (3.23%)	5 (0.34%)	0.002183	0.024173							GO Enrichment (Cellular Component)
GO:0044464	cell part	92 (92.93%)	1130 (76.25%)	7e-06	5.8e-05	GO:0019866	organelle inner membrane	6 (6.45%)	23 (1.55%)	0.002198	0.024173							GO ID	Description	Cluster_0 (99)	All (1482)	pvalue	p.adjust
GO:0005623	cell	92 (92.93%)	1131 (76.32%)	8e-06	5.8e-05	GO:0022624	proteasome accessory complex	2 (2.15%)	2 (0.13%)	0.003898	0.036028							——	——	——	——	——	——
GO:0015935	small ribosomal subunit	6 (6.06%)	12 (0.81%)	5.1e-05	0.000368	GO:0000313	organellar ribosome	3 (3.23%)	6 (0.4%)	0.004169	0.036028							Pathway Enrichment
GO:0044444	cytoplasmic part	31 (31.31%)	243 (16.4%)	0.000101	0.000681	GO:0030135	coated vesicle	3 (3.23%)	6 (0.4%)	0.004169	0.036028							Pathway	Candidate genes with pathway annotation (264)	All genes with pathway annotation (5605)	Pvalue	Qvalue	Pathway ID
GO:0030054	cell junction	6 (6.06%)	14 (0.94%)	0.000148	0.000936	Pathway Enrichment												Non-alcoholic fatty liver disease (NAFLD)	22 (9.36%)	108 (1.93%)	0	0	ko04932
GO:0015934	large ribosomal subunit	5 (5.05%)	10 (0.67%)	0.000232	0.001379	Pathway	Candidate genes with pathway annotation (264)	All genes with pathway annotation (5605)	Pvalue	Qvalue	Pathway ID							Kaposi sarcoma-associated herpesvirus infection	16 (6.81%)	62 (1.11%)	0	0	ko05167
GO:0031988	membrane-bounded vesicle	17 (17.17%)	107 (7.22%)	0.000425	0.002386	Oxidative phosphorylation	60 (17.39%)	99 (1.77%)	0	0	ko00190							Endocytosis	27 (11.49%)	176 (3.14%)	0	0	ko04144
GO:0005737	cytoplasm	32 (32.32%)	275 (18.56%)	0.000469	0.002492	Parkinson disease	57 (16.52%)	103 (1.84%)	0	0	ko05012							Alzheimer disease	22 (9.36%)	125 (2.23%)	0	0	ko05010
GO:0031982	vesicle	17 (17.17%)	110 (7.42%)	0.000597	0.003016	Alzheimer disease	54 (15.65%)	125 (2.23%)	0	0	ko05010							Parkinson disease	18 (7.66%)	103 (1.84%)	0	1e-05	ko05012
GO:0043228	non-membrane-bounded organelle	33 (33.33%)	295 (19.91%)	0.000788	0.003617	Non-alcoholic fatty liver disease (NAFLD)	49 (14.2%)	108 (1.93%)	0	0	ko04932							Chemokine signaling pathway	16 (6.81%)	90 (1.61%)	1e-06	3.2e-05	ko04062
GO:0043232	intracellular non-membrane-bounded organelle	33 (33.33%)	295 (19.91%)	0.000788	0.003617	Huntington disease	61 (17.68%)	177 (3.16%)	0	0	ko05016							Human cytomegalovirus infection	15 (6.38%)	85 (1.52%)	2e-06	6.7e-05	ko05163
GO:0070993	translation preinitiation complex	4 (4.04%)	11 (0.74%)	0.004297	0.01887	Proteasome	30 (8.7%)	40 (0.71%)	0	0	ko03050							Regulation of actin cytoskeleton	23 (9.79%)	186 (3.32%)	2e-06	7.7e-05	ko04810
Pathway Enrichment						Thermogenesis	60 (17.39%)	244 (4.35%)	0	0	ko04714							B cell receptor signaling pathway	8 (3.4%)	24 (0.43%)	3e-06	0.0001	ko04662
Pathway	Candidate genes with pathway annotation (264)	All genes with pathway annotation (5605)	Pvalue	Qvalue	Pathway ID	Retrograde endocannabinoid signaling	32 (9.28%)	90 (1.61%)	0	0	ko04723							VEGF signaling pathway	8 (3.4%)	26 (0.46%)	7e-06	0.000177	ko04370
Ribosome	70 (26.52%)	140 (2.5%)	0	0	ko03010	Epstein-Barr virus infection	26 (7.54%)	112 (2%)	0	0	ko05169							Oxidative phosphorylation	15 (6.38%)	99 (1.77%)	1.3e-05	0.000278	ko00190
Spliceosome	24 (9.09%)	131 (2.34%)	0	1e-06	ko03040	Citrate cycle (TCA cycle)	14 (4.06%)	41 (0.73%)	0	2e-06	ko00020							Huntington disease	21 (8.94%)	177 (3.16%)	1.3e-05	0.000278	ko05016
VEGF signaling pathway	8 (3.03%)	26 (0.46%)	1.6e-05	0.001396	ko04370	Carbon metabolism	24 (6.96%)	135 (2.41%)	2e-06	4.4e-05	ko01200							Oocyte meiosis	13 (5.53%)	81 (1.45%)	2.6e-05	0.000521	ko04114
Human cytomegalovirus infection	13 (4.92%)	85 (1.52%)	0.000147	0.009468	ko05163	Pyruvate metabolism	10 (2.9%)	38 (0.68%)	6.9e-05	0.001566	ko00620							Hepatitis B	11 (4.68%)	62 (1.11%)	4.3e-05	0.000784	ko05161
Estrogen signaling pathway	11 (4.17%)	65 (1.16%)	0.00019	0.009819	ko04915	Protein processing in endoplasmic reticulum	28 (8.12%)	214 (3.82%)	0.000102	0.002155	ko04141							Hedgehog signaling pathway - fly	7 (2.98%)	26 (0.46%)	6.9e-05	0.001111	ko04341
Renal cell carcinoma	9 (3.41%)	48 (0.86%)	0.000331	0.01423	ko05211	Metabolic pathways	117 (33.91%)	1417 (25.28%)	0.000135	0.002639	ko01100							MAPK signaling pathway	16 (6.81%)	127 (2.27%)	6.9e-05	0.001111	ko04010
Kaposi sarcoma-associated herpesvirus infection	10 (3.79%)	62 (1.11%)	0.000555	0.020464	ko05167	Collecting duct acid secretion	6 (1.74%)	15 (0.27%)	0.000162	0.00296	ko04966							T cell receptor signaling pathway	8 (3.4%)	35 (0.62%)	7.5e-05	0.001111	ko04660
Long-term potentiation	8 (3.03%)	45 (0.8%)	0.001027	0.030676	ko04720	Epithelial cell signaling in Helicobacter pylori infection	10 (2.9%)	45 (0.8%)	0.000314	0.005382	ko05120							Dopaminergic synapse	11 (4.68%)	66 (1.18%)	7.8e-05	0.001111	ko04728
Vascular smooth muscle contraction	11 (4.17%)	79 (1.41%)	0.00107	0.030676	ko04270	Synaptic vesicle cycle	9 (2.61%)	42 (0.75%)	0.000831	0.013393	ko04721							Viral carcinogenesis	15 (6.38%)	117 (2.09%)	9.6e-05	0.001303	ko05203
Oocyte meiosis	11 (4.17%)	81 (1.45%)	0.001321	0.034075	ko04114	Rheumatoid arthritis	8 (2.32%)	37 (0.66%)	0.001516	0.023073	ko05323							Cardiac muscle contraction	12 (5.11%)	82 (1.46%)	0.000136	0.001554	ko04260
Fc gamma R-mediated phagocytosis	10 (3.79%)	72 (1.28%)	0.001829	0.042893	ko04666
Herpes simplex infection	11 (4.17%)	86 (1.53%)	0.002164	0.046525	ko05168
